# Supplementary material for: Impact of Matrix Species and Mass Spectrometry on Matrix Effects in Multi-Residue Pesticide Analysis Based on QuEChERS-LC-MS
Source: MDPI journal article supplement (doi:10.3390/foods12061226), 2023-03-13
Supplement: s1 [file s1]

# **Supplementary for: Impact of matrix species and mass spectrometries on matrix effects in multi-residue pesticide analysis based on QuEChERS-LC-MS**

**Shuang Zhang 1,2, Zhiyong He 1,2, Maomao Zeng 1,2, Chen Jie 1,2,\***

<sup>1</sup> State Key Laboratory of Food Science and Technology, Jiangnan University, Wuxi, Jiangsu 214122, China

<sup>2</sup> International Joint Laboratory on Food Safety, Jiangnan University, Wuxi, Jiangsu 214122, China

<sup>3</sup> Joint Laboratory of Omics Technologies for Special Food, Jiangnan University, Wuxi, Jiangsu 214122, China

\* Correspondence: chenjie@jiangnan.edu.cn; Tel.: +86-139-6176-1357

**Table S1.** Chemical abstracts service number (CAS No.), chemical classes, usage types, Octanol-water partition coefficient ( $K_{ow}$ ), retention time ( $t_R$ , min), and adduct as well as theoretical m/z of precursor ions for 73 pesticides.

| Name                | CAS No.     | Chemical classes | Usage types                                             | $K_{ow}$ | $t_R$ (min) | Adduct    | Theoretical m/z |
|---------------------|-------------|------------------|---------------------------------------------------------|----------|-------------|-----------|-----------------|
| Alachlor            | 15972-60-8  | Chloroacetamide  | Herbicide                                               | 3.09     | 9.45        | $[M+H]^+$ | 270.1255        |
| Ametryn             | 834-12-8    | Triazine         | Herbicide                                               | 2.63     | 6.81        | $[M+H]^+$ | 228.1277        |
| Atrazine            | 1912-24-9   | Triazine         | Herbicide                                               | 2.7      | 7.61        | $[M+H]^+$ | 216.1011        |
| Carbendazim         | 10605-21-7  | Benzimidazole    | Fungicide, Metabolite                                   | 1.48     | 4.02        | $[M+H]^+$ | 192.0768        |
| Chlordimeform       | 6164-98-3   | Formamidine      | Acaricide, Insecticide, Ovicide                         | 2.89     | 4.87        | $[M+H]^+$ | 197.0804        |
| Chlorpyrifos        | 2921-88-2   | Organophosphate  | Insecticide                                             | 4.7      | 11.16       | $[M+H]^+$ | 321.9023        |
| Chlorpyrifos-methyl | 5598-13-0   | Organophosphate  | Insecticide, Acaricide                                  | 4        | 8.56        | $[M+H]^+$ | 349.9336        |
| Chlorsulfuron       | 64902-72-3  | Sulfonylurea     | Herbicide                                               | 2.14     | 7.33        | $[M+H]^+$ | 358.0371        |
| Coumaphos10.        | 56-72-4     | Organophosphate  | Insecticide                                             | 3.89     | 10.1        | $[M+H]^+$ | 363.0217        |
| Cyflufenamid        | 180409-60-3 | Amidoxine        | Fungicide                                               | 4.7      | 10.36       | $[M+H]^+$ | 413.1283        |
| DEET                | 134-62-3    | Unclassified     | Insecticide, Repellent                                  | 2.18     | 7.7         | $[M+H]^+$ | 192.1383        |
| Diazinon            | 333-41-5    | Organophosphate  | Insecticide, Acaricide, Repellent, Veterinary substance | 3.69     | 10.19       | $[M+H]^+$ | 305.1083        |
| Dichlorvos          | 62-73-7     | Organophosphate  | Insecticide, Acaricide                                  | 1.9      | 6.87        | $[M+H]^+$ | 220.9532        |
| Diethofencarb       | 87130-20-9  | Carbamate        | Fungicide                                               | 2.89     | 8.64        | $[M+H]^+$ | 268.1543        |
| Difenoconazole      | 119446-68-3 | Triazole         | Fungicide                                               | 4.36     | 9.76        | $[M+H]^+$ | 406.0720        |
| Dimethenamid        | 87674-68-8  | Chloroacetamide  | Herbicide                                               | 2.2      | 8.79        | $[M+H]^+$ | 276.0820        |
| Dimethoate          | 60-51-5     | Organophosphate  | Insecticide, Acaricide, Metabolite                      | 0.75     | 5.72        | $[M+H]^+$ | 230.0069        |
| Disulfoton          | 298-04-4    | Organophosphate  | Insecticide, Acaricide                                  | 3.95     | 7.3         | /         | /               |

|                 |             |                               |                                                         |      |       |                    |          |
|-----------------|-------------|-------------------------------|---------------------------------------------------------|------|-------|--------------------|----------|
| Edifenphos      | 17109-49-8  | Organophosphate               | Fungicide                                               | 3.83 | 9.65  | [M+H] <sup>+</sup> | 311.0324 |
| Epoxiconazole   | 135319-73-2 | Triazole                      | Fungicide                                               | 3.3  | 8.84  | [M+H] <sup>+</sup> | 330.0804 |
| Ethiofencarb    | 29973-13-5  | Carbamate                     | Insecticide                                             | 2.04 | 7.67  | [M+H] <sup>+</sup> | 226.0896 |
| Ethoprophos     | 13194-48-4  | Organophosphate               | Insecticide<br>,<br>Nematicide                          | 2.99 | 9.04  | [M+H] <sup>+</sup> | 243.0637 |
| Ethion          | 563-12-2    | Organophosphate               | Insecticide<br>,<br>Acaricide,<br>Metabolite            | 5.07 | 10.28 | [M+H] <sup>+</sup> | 384.9949 |
| Fenarimol       | 60168-88-9  | Pyrimidine                    | Fungicide                                               | 3.69 | 8.7   | [M+H] <sup>+</sup> | 331.0399 |
| Fenchlorphos    | 299-84-3    | Organophosphate               | Insecticide<br>,<br>Veterinary<br>substance             | 4.88 | 8.56  | [M+H] <sup>+</sup> | 320.9070 |
| Fenitrothion    | 2255-17-6   | Organophosphate               | Insecticide                                             | 3.24 | 8.8   | /                  | /        |
| Fenobucarb      | 3766-81-2   | Carbamate                     | Insecticide                                             | 2.78 | 8.5   | /                  | /        |
| Fenpropathrin   | 39515-41-8  | Pyrethroid                    | Insecticide<br>, Acaricide                              | 6.04 | 11.19 | [M+H] <sup>+</sup> | 350.1751 |
| Fenthion        | 55-38-9     | Organophosphate               | Insecticide<br>,<br>Veterinary<br>substance,<br>Avicide | 4.84 | 9.9   | [M+H] <sup>+</sup> | 279.0273 |
| Fluazifop-butyl | 69806-50-4  | Aryloxyphenoxy<br>pr-opionate | Herbicide                                               | 4.5  | 9.34  | [M+H] <sup>+</sup> | 384.1417 |
| Fludioxonil     | 131341-86-1 | Phenylpyrrole                 | Fungicide                                               | 4.12 | 8.5   | [M+H] <sup>+</sup> | 249.0470 |
| Fluquinconazole | 136426-54-5 | Triazole                      | Fungicide                                               | 3.24 | 8.96  | [M+H] <sup>+</sup> | 376.0163 |
| Flutriafol      | 76674-21-0  | Triazole                      | Fungicide                                               | 2.31 | 7.41  | [M+H] <sup>+</sup> | 302.1099 |
| Hexythiazox     | 78587-05-0  | Carboxamide                   | Acaricide                                               | 2.67 | 11.21 | [M+H] <sup>+</sup> | 353.1085 |
| Iprobenfos      | 26087-47-8  | Organophosphate               | Fungicide                                               | 3.37 | 7.62  | [M+H] <sup>+</sup> | 289.1022 |
| Isazofos        | 42509-80-8  | Organophosphate               | Insecticide<br>,<br>Nematicide                          | 3.1  | 9.28  | [M+H] <sup>+</sup> | 314.0490 |
| Isoprocarb      | 2631-40-5   | Carbamate                     | Insecticide                                             | 2.32 | 9.28  | [M+H] <sup>+</sup> | 194.1176 |

|                        |            |                 |                                                           |       |       |                    |          |
|------------------------|------------|-----------------|-----------------------------------------------------------|-------|-------|--------------------|----------|
| Malathion              | 121-75-5   | Organophosphate | Insecticide<br>,<br>Acaricide,<br>Veterinary<br>substance | 2.75  | 9.25  | [M+H] <sup>+</sup> | 331.0433 |
| Metalaxyl              | 57837-19-1 | Phenylamide     | Fungicide                                                 | 1.75  | 7.71  | [M+H] <sup>+</sup> | 280.1543 |
| Methamidophos          | 10265-92-6 | Organophosphate | Insecticide<br>, Acaricide<br>Metabolite                  | -0.82 | 1.06  | [M+H] <sup>+</sup> | 142.0086 |
| Methiathion            | 950-37-8   | Organophosphate | Insecticide<br>, Acaricide                                | 2.57  | 8.54  | [M+H] <sup>+</sup> | 302.9691 |
| Methyl-Parathion       | 298-00-0   | Organophosphate | Insecticide                                               | 3     | 8.93  | [M+H] <sup>+</sup> | 264.0090 |
| Metolachlor            | 51218-45-2 | Chloroacetamide | Herbicide                                                 | 3.4   | 9.44  | /                  | /        |
| Monocrotophos          | 6923-22-4  | Organophosphate | Insecticide<br>, Acaricide                                | 1.45  | 4.53  | [M+H] <sup>+</sup> | 224.0682 |
| Myclobutanil           | 88671-89-0 | Triazole        | Fungicide                                                 | 2.89  | 8.73  | [M+H] <sup>+</sup> | 289.1215 |
| Omethoate              | 1113-02-6  | Organophosphate | Insecticide<br>,<br>Acaricide,<br>Metabolite              | -0.74 | 3.56  | [M+H] <sup>+</sup> | 214.0297 |
| Oxadixyl               | 77732-09-3 | Phenylamide     | Fungicide                                                 | 0.65  | 6.71  | [M+H] <sup>+</sup> | 279.1339 |
| Parathion              | 56-38-2    | Organophosphate | Insecticide<br>, Acaricide                                | 3.83  | 9.86  | [M+H] <sup>+</sup> | 292.0403 |
| Pendimethalin          | 40487-42-1 | Dinitroaniline  | Herbicide                                                 | 5.4   | 11.21 | [M+H] <sup>+</sup> | 282.1448 |
| Phorate                | 298-02-2   | Organophosphate | Insecticide<br>,<br>Acaricide,<br>Nematicide              | 3.86  | 10.31 | /                  | /        |
| Phorate sulfone        | 251386     | Organophosphate | Insecticide<br>,<br>Metabolite                            | 4.14  | 8.38  | /                  | /        |
| Phorate-oxon sulfoxide | 251417     | Organophosphate | Insecticide<br>,<br>Metabolite                            | 3.49  | 7.45  | /                  | /        |
| Phosalone              | 2310-17-0  | Organophosphate | Insecticide<br>, Acaricide                                | 4.01  | 10.27 | [M+H] <sup>+</sup> | 367.9941 |
| Phosmet                | 732-11-6   | Organophosphate | Insecticide<br>,<br>Acaricide,                            | 2.8   | 8.7   | [M+H] <sup>+</sup> | 318.0018 |

|                    |             |                   |                                               |      |       |                    |          |
|--------------------|-------------|-------------------|-----------------------------------------------|------|-------|--------------------|----------|
|                    |             |                   | Veterinary substance                          |      |       |                    |          |
| Phosphamidon       | 13171-21-6  | Organophosphate   | Insecticide , Acaricide                       | 0.8  | 6.45  | [M+H] <sup>+</sup> | 300.0762 |
| Piperonyl butoxide | 18693       | Cyclic aromatic   | Veterinary substance                          | 4.75 | 10.88 | [M+H] <sup>+</sup> | 334.1349 |
| Pirimiphos methyl  | 29232-93-7  | Organophosphate   | Insecticide , Acaricide                       | 4.2  | 10.27 | [M+H] <sup>+</sup> | 306.1036 |
| Profenofos         | 41198-08-7  | Organophosphate   | Insecticide , Acaricide                       | 1.7  | 10.56 | [M+H] <sup>+</sup> | 372.9424 |
| Prometryn          | 7287-19-6   | Triazine          | Herbicide                                     | 3.34 | 7.61  | [M+H] <sup>+</sup> | 242.1434 |
| Propargite         | 2312-35-8   | Sulphite ester    | Acaricide                                     | 5.7  | 11.4  | /                  | /        |
| Propazine          | 139-40-2    | Triazine          | Herbicide                                     | 3.95 | 8.35  | [M+H] <sup>+</sup> | 230.1167 |
| Prothiofos         | 34643-46-4  | Organophosphate   | Insecticide                                   | 5.67 | 11.94 | [M+H] <sup>+</sup> | 344.9701 |
| Pyridaben          | 96489-71-3  | Pyridazinone      | Insecticide , Acaricide                       | 6.37 | 11.75 | [M+H] <sup>+</sup> | 365.1449 |
| Pyridaphenthion    | 119-12-0    | Organophosphate   | Insecticide                                   | 3.2  | 8.93  | [M+H] <sup>+</sup> | 341.0719 |
| Pyrimethanil       | 53112-28-0  | Anilinopyrimidine | Fungicide                                     | 2.84 | 7.45  | [M+H] <sup>+</sup> | 200.1182 |
| Pyroquilon         | 57369-32-1  | Unclassified      | Fungicide                                     | 1.57 | 6.33  | [M+H] <sup>+</sup> | 174.0913 |
| Quinalphos         | 13593-03-8  | Organophosphate   | Insecticide , Acaricide                       | 4.44 | 9.79  | [M+H] <sup>+</sup> | 299.0614 |
| Tolclofos methyl   | 57018-04-9  | Chlorophenyl      | Fungicide                                     | 3.8  | 6.42  | /                  | /        |
| Tau-Fluvalinate    | 102851-06-9 | Pyrethroid        | Insecticide , Veterinary substance, Acaricide | 7.02 | 11.98 | [M+H] <sup>+</sup> | 503.1344 |
| Triadimenol        | 55219-65-3  | Triazole          | Fungicide, Metabolite                         | 3.18 | 8.3   | /                  | /        |
| Triazophos         | 24017-47-8  | Organophosphate   | Insecticide , Acaricide, Nematicide           | 3.55 | 9.27  | [M+H] <sup>+</sup> | 314.0723 |
| Triticonazole      | 131983-72-7 | Triazole          | Fungicide                                     | 3.29 | 8.5   | /                  | /        |
| Vamidothion        | 2275-23-2   | Organophosphate   | Insecticide , Acaricide                       | 0.15 | 5.21  | [M+H] <sup>+</sup> | 288.0488 |



**Table S2** Latin plant names, botanical classifications, categories in the GB 23200.121-2021 National Food Safety Standard, categories in the Document N° SANTE/11312/2021, and code information in mass-spectrometry-related and chromatography-related comparisons of 32 commodities.

| Name                  | Latin name                              | Family        | Categories in the GB 2763-2021 National Food Safety Standard  | Categories in the Document N° SANTE/11312/2021        | Codes in mass-spectrometry-related comparisons |
|-----------------------|-----------------------------------------|---------------|---------------------------------------------------------------|-------------------------------------------------------|------------------------------------------------|
| Cabbage               | <i>Brassica oleracea</i> L.             | Brassicaceae  | Vegetables- Brassica class- Ball brassical                    | High water content-Brassica vegetables                | IDA8<br>MRM8                                   |
| Mint                  | <i>Mentha haplocalyx</i> Briq.          | Lamiaceae     | Condiment-Leaf                                                | High water content-Leafy vegetables and fresh herbs   | IDA20<br>MRM20                                 |
| Wheatgrass            | <i>Agropyron cristatum</i> (L.) Gaertn. | Poaceae       | Vegetable-Leaf Vegetable- Green leafy vegetables              | High water content-Leafy vegetables and fresh herbs   | IDA30<br>MRM30                                 |
| <i>Amomum tsao-ko</i> | <i>Amomum tsaoko</i> Crevost et Lemarie | Zingiberaceae | Condiment-Fruits                                              | High water content- Stem and stalk vegetables         | IDA2<br>MRM2                                   |
| Orange                | <i>Citrus sinensis</i> (L.) Osbeck      | Rutaceae      | Fruits-Citurs                                                 | High acid content and high water content-Citrus fruit | IDA22<br>MRM22                                 |
| Soybean               | <i>Glycine max</i> (Linn.) Merr.        | Fabaceae      | Oil and grease- Large-scale oil seeds class                   | High oil content and very low water content-Oil seeds | IDA29<br>MRM29                                 |
| Red chili             | <i>Capsicum annuum</i> L.               | Solanaceae    | Vegetable- Solanaceous Vegetable- Other Solanaceous Vegetable | High water content-fruiting vegetables/cucurbits      | IDA25<br>MRM25                                 |

|                              |                                                    |                     |                                                           |                                                                     |                |
|------------------------------|----------------------------------------------------|---------------------|-----------------------------------------------------------|---------------------------------------------------------------------|----------------|
| Amaranth                     | <i>Amaranthus tricolor</i> L.                      | Amaranthaceae       | Vegetable-Leaf Vegetable-<br>Green leafy vegetables       | High water content-Leafy vegetables<br>and fresh herbs              | IDA1<br>MRM1   |
| Sichuan<br>pepper            | <i>Zanthoxylum bungeanum</i><br>Maxim              | Rutaceae            | Condiment-Fruits                                          | /                                                                   | IDA28<br>MRM28 |
| Cowpea                       | <i>Vigna unguiculata</i><br>(Linn.) Walp.          | Fabaceae            | Vegetable-Legume- Pod<br>edible legume                    | High water content-Fresh legume<br>vegetables                       | IDA11<br>MRM11 |
| Blueberry                    | <i>Vaccinium Spp.</i>                              | <i>Ericaceae</i>    | Fruits- berries and other<br>small fruit- bind and shrubs | High acid content and high water<br>content-Small fruit and berries | IDA7<br>MRM7   |
| Winged<br>bean               | <i>Psophocarpus tetragonolobus</i><br>(Linn.) D.C. | <i>Fabaceae</i>     | Vegetable- Legume - Pod<br>edible legume                  | High water content-Fresh legume<br>vegetables                       | IDA31<br>MRM31 |
| <i>Artemisia selengensis</i> | <i>Artemisia selengensis</i><br>Turcz. ex Bess.    | <i>Asteraceae</i>   | Vegetable- Leaf Vegetable-<br>Green leafy vegetables      | High water content-Stem and stalk<br>vegetables                     | IDA3<br>MRM3   |
| Asparagus                    | <i>Asparagus officinalis</i> L.                    | <i>Asparagaceae</i> | Vegetable-Stem                                            | High water content-Stem and stalk<br>vegetables                     | IDA4<br>MRM4   |
| Basil                        | <i>Ocimum basilicum</i>                            | <i>Lamiaceae</i>    | Condiment-Leaf                                            | High water content-Leafy vegetables<br>and fresh herbs              | IDA5<br>MRM5   |



|                 |                                           |                      |                                                                     |                                                       |                |
|-----------------|-------------------------------------------|----------------------|---------------------------------------------------------------------|-------------------------------------------------------|----------------|
| Green tea       | /                                         | /                    | Beverage                                                            | High water content-Difficult or unique commodities    | IDA16<br>MRM16 |
| Rosemary        | <i>Rosmarinus officinalis</i>             | <i>Lamiaceae</i>     | Condiment-Leaf                                                      | High water content-Stem and stalk vegetables          | IDA26<br>MRM26 |
| Lemon           | <i>Citrus limon</i> (L.) Burm. f.         | <i>Rutaceae</i>      | Fruits- Citrus                                                      | High acid content and high water content-Citrus fruit | IDA18<br>MRM18 |
| Oyster mushroom | <i>Pleurotus ostreatus</i>                | <i>Pleurotaceae</i>  | Edible fungi- Mushrooms                                             | High water content-Fresh Fungi                        | IDA23<br>MRM23 |
| Green chili     | <i>Capsicum annuum</i> L.                 | <i>Solanaceae</i>    | Vegetable- Solanaceous<br>Vegetable- Other<br>Solanaceous Vegetable | High water content-fruiting vegetables/cucurbits      | IDA14<br>MRM14 |
| Okra            | <i>Abelmoschus esculentus</i> (L.) Moench | <i>Malvaceae</i>     | Vegetable- Solanaceous<br>Vegetable- Other<br>Solanaceous Vegetable | High water content-Fruiting vegetables/cucurbits      | IDA21<br>MRM21 |
| Chinese yam     | <i>Dioscorea oppositifolia</i> L.         | <i>Dioscoreaceae</i> | Vegetable- Tuber<br>vegetable- Other tuber<br>vegetable             | High water content-Root and tuber vegetables          | IDA9<br>MRM9   |
| Ginger          | <i>Zingiber officinale</i><br>Roscoe      | <i>Zingiberaceae</i> | Vegetable- Rhizomes                                                 | High water content-Root and tuber vegetables          | IDA13<br>MRM13 |

|                           |                                     |                      |                                  |                                                                              |                |
|---------------------------|-------------------------------------|----------------------|----------------------------------|------------------------------------------------------------------------------|----------------|
| Garlic sprout             | <i>Allium sativum</i> L.            | <i>Liliaceae</i>     | Vegetable- Stem brassicas        | High water content-Stem and stalk vegetables                                 | IDA12<br>MRM12 |
| Pea seedlings             | <i>Pisum sativum</i> L.             | <i>Fabaceae</i>      | Vegetable- Sprouts               | High water content-Fresh legume vegetables                                   | IDA24<br>MRM24 |
| Zucchini                  | <i>Cucurbita pepo</i> L.            | <i>Cucurbitaceae</i> | Vegetable- Gourd- Small gourd    | High water content-fruiting vegetables/cucurbits                             | IDA32<br>MRM32 |
| Maize                     | <i>Zea mays</i> L.                  | <i>Poaceae</i>       | Cereal- Dry grain                | High starch and low water and fat content- Cereal grain and products thereof | IDA19<br>MRM19 |
| Shiitake mushroom         | <i>Lentinus edodes</i> (Berk.) Sing | <i>Omphalotaceae</i> | Edible fungi- Mushrooms          | High water content-Fresh Fungi                                               | IDA27<br>MRM27 |
| Bay leaf                  | <i>Laurus nobilis</i> L.            | <i>Lauraceae</i>     | Condiment-Leaf                   | /                                                                            | IDA6<br>MRM6   |
| Cilantro                  | <i>Coriandrum sativum</i> L.        | <i>Apiaceae</i>      | Condiment-Leaf                   | High water content-Leafy vegetables and fresh herbs                          | IDA10<br>MRM10 |
| <i>Houttuynia cordata</i> | <i>Herba Houttuyniae</i>            | <i>Saururaceae</i>   | Medicinal plant- Leaves and stem | High water content-Stem and stalk vegetables                                 | IDA17<br>MRM17 |

|                   |                                                                                                                          |                   |                                                                     |                                                     |                |
|-------------------|--------------------------------------------------------------------------------------------------------------------------|-------------------|---------------------------------------------------------------------|-----------------------------------------------------|----------------|
| Green<br>Pimiento | <i>Capsicum</i><br><i>frutescens</i> L.<br>(syn. <i>C.</i><br><i>annuum</i> L. )<br><i>var.grossum</i><br><i>Bailey.</i> | <i>Solanaceae</i> | Vegetable- Solanaceous<br>Vegetable- Other<br>Solanaceous Vegetable | High water content-fruiting<br>vegetables/cucurbits | IDA15<br>MRM15 |
|-------------------|--------------------------------------------------------------------------------------------------------------------------|-------------------|---------------------------------------------------------------------|-----------------------------------------------------|----------------|

**Table S3** UHPLC-MS/MS ion transitions, declustering potential (DP), entrance potential (EP), collision energy (CE) and cell exit potential (CXP).

| <b>Precursor ion<br/>(m/z)</b> | <b>Product ion<br/>(m/z)</b> | <b>ID</b>       | <b>DP<br/>(V)</b> | <b>EP<br/>(V)</b> | <b>CE<br/>(eV)</b> | <b>CXP<br/>(V)</b> |
|--------------------------------|------------------------------|-----------------|-------------------|-------------------|--------------------|--------------------|
| 270.0                          | 238.1                        | Alachlor 1      | 41                | 10                | 17                 | 14                 |
| 270.0                          | 162.2                        | Alachlor 2      | 41                | 10                | 27                 | 10                 |
| 270.0                          | 146.9                        | Alachlor 3      | 41                | 10                | 41                 | 18                 |
| 228.1                          | 68.0                         | Ametryn 1       | 156               | 10                | 59                 | 8                  |
| 228.1                          | 96.0                         | Ametryn 2       | 156               | 10                | 39                 | 26                 |
| 228.1                          | 91.0                         | Ametryn 3       | 156               | 10                | 35                 | 10                 |
| 215.9                          | 174.2                        | Atrazine1       | 120               | 10                | 24                 | 13                 |
| 215.9                          | 146.0                        | Atrazine 2      | 120               | 10                | 30                 | 13                 |
| 215.9                          | 132.0                        | Atrazine 3      | 120               | 10                | 32                 | 13                 |
| 215.9                          | 104.0                        | Atrazine 4      | 120               | 10                | 38                 | 13                 |
| 192.0                          | 160.0                        | Carbendazim 1   | 41                | 10                | 25                 | 10                 |
| 192.0                          | 132.0                        | Carbendazim 2   | 41                | 10                | 41                 | 14                 |
| 192.0                          | 105.0                        | Carbendazim 3   | 41                | 10                | 49                 | 16                 |
| 192.0                          | 117.0                        | Carbendazim 4   | 41                | 10                | 43                 | 14                 |
| 192.0                          | 133.0                        | Carbendazim 5   | 41                | 10                | 41                 | 12                 |
| 192.0                          | 106.1                        | Carbendazim 6   | 41                | 10                | 51                 | 12                 |
| 197.0                          | 117.1                        | Chlordimeform 1 | 151               | 10                | 37                 | 12                 |
| 197.0                          | 89.0                         | Chlordimeform 2 | 151               | 10                | 61                 | 12                 |
| 197.0                          | 90.1                         | Chlordimeform 3 | 151               | 10                | 61                 | 14                 |
| 197.0                          | 63.0                         | Chlordimeform 4 | 151               | 10                | 81                 | 16                 |
| 197.0                          | 133.0                        | Chlordimeform 5 | 151               | 10                | 32                 | 16                 |
| 197.0                          | 106.1                        | Chlordimeform 6 | 151               | 10                | 60                 | 16                 |
| 350.0                          | 96.9                         | Chlorpyrifos 1  | 82                | 10                | 49                 | 9                  |
| 350.0                          | 197.9                        | Chlorpyrifos 2  | 82                | 10                | 29                 | 9                  |
| 350.0                          | 125.0                        | Chlorpyrifos 3  | 82                | 10                | 25                 | 16                 |

|       |       |                       |     |    |    |    |
|-------|-------|-----------------------|-----|----|----|----|
| 350.0 | 153.0 | Chlorpyrifos 4        | 82  | 10 | 19 | 13 |
| 350.0 | 106.9 | Chlorpyrifos 5        | 82  | 10 | 77 | 12 |
| 321.9 | 145.1 | Chlorpyrifos methyl 1 | 56  | 10 | 19 | 10 |
| 321.9 | 85.1  | Chlorpyrifos methyl 2 | 56  | 10 | 35 | 10 |
| 321.9 | 58.1  | Chlorpyrifos methyl 3 | 56  | 10 | 57 | 8  |
| 359.1 | 167.1 | Chlorsulfuron 1       | 82  | 10 | 29 | 12 |
| 359.1 | 141.1 | Chlorsulfuron 2       | 82  | 10 | 23 | 14 |
| 359.1 | 142.2 | Chlorsulfuron 3       | 82  | 10 | 25 | 8  |
| 359.1 | 168.0 | Chlorsulfuron 4       | 82  | 10 | 25 | 10 |
| 362.9 | 227.0 | Coumaphos 1           | 176 | 10 | 35 | 14 |
| 362.9 | 306.9 | Coumaphos 2           | 176 | 10 | 25 | 18 |
| 362.9 | 335.0 | Coumaphos 3           | 176 | 10 | 21 | 20 |
| 362.9 | 131.1 | Coumaphos 4           | 176 | 10 | 73 | 16 |
| 413.0 | 295.0 | Cyflufenamid 1        | 50  | 10 | 23 | 16 |
| 413.0 | 241.1 | Cyflufenamid 2        | 50  | 10 | 31 | 14 |
| 413.0 | 359.3 | Cyflufenamid 3        | 50  | 10 | 19 | 13 |
| 413.0 | 203.0 | Cyflufenamid 4        | 50  | 10 | 57 | 12 |
| 413.0 | 341.2 | Cyflufenamid 5        | 50  | 10 | 19 | 13 |
| 413.0 | 91.0  | Cyflufenamid 6        | 50  | 10 | 71 | 10 |
| 192.1 | 119.1 | DEET 1                | 91  | 10 | 25 | 6  |
| 192.1 | 91.0  | DEET 2                | 91  | 10 | 41 | 14 |
| 192.1 | 65.1  | DEET 3                | 91  | 10 | 63 | 10 |
| 192.1 | 72.1  | DEET 4                | 91  | 10 | 29 | 8  |
| 305.0 | 169.0 | Diazinon 1            | 120 | 10 | 27 | 11 |
| 305.0 | 153.0 | Diazinon 2            | 120 | 10 | 28 | 11 |
| 220.9 | 109.1 | Dichlorvos 1          | 136 | 10 | 23 | 8  |
| 220.9 | 79.0  | Dichlorvos 2          | 136 | 10 | 39 | 12 |
| 220.9 | 95.0  | Dichlorvos 3          | 136 | 10 | 49 | 12 |
| 220.9 | 60.1  | Dichlorvos 4          | 136 | 10 | 75 | 8  |

|       |       |                     |     |    |     |    |
|-------|-------|---------------------|-----|----|-----|----|
| 268.1 | 226.0 | Diethofencarb 1     | 31  | 10 | 15  | 14 |
| 268.1 | 123.9 | Diethofencarb 2     | 31  | 10 | 45  | 14 |
| 268.1 | 180.1 | Diethofencarb 3     | 31  | 10 | 25  | 12 |
| 268.1 | 152.1 | Diethofencarb 4     | 31  | 10 | 31  | 10 |
| 406.1 | 337.0 | Difenoconazole 1    | 120 | 10 | 23  | 7  |
| 406.1 | 251.0 | Difenoconazole 2    | 120 | 10 | 35  | 16 |
| 406.1 | 188.0 | Difenoconazole 3    | 120 | 10 | 61  | 10 |
| 406.1 | 75.0  | Difenoconazole 4    | 120 | 10 | 115 | 10 |
| 406.1 | 111.0 | Difenoconazole 5    | 120 | 10 | 73  | 12 |
| 276.0 | 244.0 | Dimethenamid 1      | 80  | 10 | 21  | 18 |
| 276.0 | 168.1 | Dimethenamid 2      | 80  | 10 | 33  | 10 |
| 276.0 | 111.0 | Dimethenamid 3      | 80  | 10 | 43  | 14 |
| 276.0 | 126.0 | Dimethenamid 4      | 80  | 10 | 47  | 16 |
| 230.0 | 199.0 | Dimethoate 1        | 60  | 10 | 13  | 18 |
| 230.0 | 125.0 | Dimethoate 2        | 60  | 10 | 29  | 14 |
| 230.0 | 171.0 | Dimethoate 3        | 60  | 10 | 21  | 12 |
| 230.0 | 79.0  | Dimethoate 4        | 60  | 10 | 45  | 36 |
| 328.0 | 283.0 | Edifenphos 1        | 90  | 10 | 25  | 16 |
| 328.0 | 109.0 | Edifenphos 2        | 90  | 10 | 49  | 16 |
| 328.0 | 311.3 | Edifenphos 3        | 90  | 10 | 14  | 13 |
| 328.0 | 111.0 | Edifenphos 4        | 90  | 10 | 35  | 14 |
| 328.0 | 173.1 | Edifenphos 5        | 90  | 10 | 32  | 13 |
| 886.2 | 158.1 | Enamectin Benzote 1 | 60  | 10 | 43  | 10 |
| 886.2 | 302.1 | Enamectin Benzote 2 | 60  | 10 | 41  | 20 |
| 886.2 | 126   | Enamectin Benzote 3 | 60  | 10 | 79  | 14 |
| 886.2 | 108.1 | Enamectin Benzote 4 | 60  | 10 | 139 | 12 |
| 886.2 | 98.1  | Enamectin Benzote 5 | 60  | 10 | 117 | 8  |
| 886.2 | 123.0 | Enamectin Benzote 6 | 60  | 10 | 107 | 16 |
| 330.3 | 121.0 | Epoxiconazole 1     | 120 | 10 | 27  | 9  |

|       |       |                 |     |    |     |    |
|-------|-------|-----------------|-----|----|-----|----|
| 330.3 | 101.1 | Epoxiconazole 2 | 120 | 10 | 67  | 12 |
| 330.3 | 141.0 | Epoxiconazole 3 | 120 | 10 | 23  | 13 |
| 330.3 | 75.0  | Epoxiconazole 4 | 120 | 10 | 103 | 12 |
| 330.3 | 123.0 | Epoxiconazole 5 | 120 | 10 | 23  | 13 |
| 330.3 | 74.0  | Epoxiconazole 6 | 120 | 10 | 153 | 20 |
| 226.1 | 106.9 | Ethiofencarb 1  | 61  | 10 | 21  | 9  |
| 226.1 | 164.1 | Ethiofencarb 2  | 61  | 10 | 11  | 9  |
| 226.1 | 77.1  | Ethiofencarb 3  | 120 | 10 | 59  | 12 |
| 384.9 | 199.0 | Ethion 1        | 60  | 10 | 15  | 14 |
| 384.9 | 143.1 | Ethion 2        | 60  | 10 | 37  | 12 |
| 384.9 | 97.0  | Ethion 3        | 60  | 10 | 77  | 12 |
| 243.2 | 97.0  | Ethoprophos 1   | 80  | 10 | 47  | 12 |
| 243.2 | 173.2 | Ethoprophos 2   | 80  | 10 | 20  | 13 |
| 243.2 | 130.9 | Ethoprophos 3   | 80  | 10 | 29  | 14 |
| 243.2 | 121.1 | Ethoprophos 4   | 80  | 10 | 31  | 14 |
| 243.2 | 139.0 | Ethoprophos 5   | 80  | 10 | 20  | 13 |
| 243.2 | 201.1 | Ethoprophos 6   | 80  | 10 | 16  | 13 |
| 331.2 | 268.0 | Fenarimol 1     | 161 | 10 | 31  | 16 |
| 331.2 | 111.0 | Fenarimol 2     | 161 | 10 | 79  | 12 |
| 331.2 | 81.0  | Fenarimol 3     | 161 | 10 | 51  | 10 |
| 320.9 | 146.0 | Fenchlorphos 1  | 70  | 10 | 19  | 16 |
| 320.9 | 145.0 | Fenchlorphos 2  | 70  | 10 | 19  | 8  |
| 320.9 | 85.0  | Fenchlorphos 3  | 70  | 10 | 35  | 14 |
| 321.2 | 304.0 | Fenchlorphos 4  | 70  | 10 | 10  | 13 |
| 278.1 | 125.0 | Fenitrothion 1  | 120 | 10 | 28  | 13 |
| 278.1 | 67.1  | Fenitrothion 2  | 120 | 10 | 49  | 18 |
| 278.1 | 108.1 | Fenitrothion 3  | 120 | 10 | 37  | 8  |
| 278.1 | 109.0 | Fenitrothion 4  | 120 | 10 | 43  | 12 |
| 208.1 | 152.0 | Fenobucarb 1    | 65  | 10 | 13  | 9  |

|       |       |                   |     |    |     |    |
|-------|-------|-------------------|-----|----|-----|----|
| 208.1 | 95.0  | Fenobucarb 2      | 65  | 10 | 19  | 10 |
| 350.3 | 97.2  | Fenpropathrin 1   | 85  | 10 | 46  | 7  |
| 350.3 | 125.1 | Fenpropathrin 2   | 50  | 10 | 25  | 13 |
| 279.0 | 169.1 | Fenthion 1        | 56  | 10 | 25  | 12 |
| 279.1 | 246.8 | Fenthion 2        | 120 | 10 | 18  | 13 |
| 384.0 | 282.1 | Fluazifop butyl 1 | 161 | 10 | 29  | 18 |
| 384.0 | 328.1 | Fluazifop butyl 2 | 161 | 10 | 23  | 22 |
| 384.0 | 254.0 | Fluazifop butyl 3 | 161 | 10 | 39  | 14 |
| 384.0 | 91.0  | Fluazifop butyl 4 | 161 | 10 | 43  | 12 |
| 266.2 | 228.9 | Fludioxonil 1     | 66  | 10 | 23  | 14 |
| 266.2 | 158.0 | Fludioxonil 2     | 66  | 10 | 47  | 16 |
| 266.2 | 185.1 | Fludioxonil 3     | 66  | 10 | 35  | 12 |
| 376.1 | 306.8 | Fluquinconazole 1 | 176 | 10 | 37  | 18 |
| 376.1 | 349.0 | Fluquinconazole 2 | 176 | 10 | 29  | 22 |
| 376.1 | 108.0 | Fluquinconazole 3 | 176 | 10 | 75  | 14 |
| 302.0 | 70.0  | Flutriafol 1      | 71  | 10 | 21  | 10 |
| 302.0 | 123.0 | Flutriafol 2      | 71  | 10 | 39  | 14 |
| 302.0 | 95.0  | Flutriafol 3      | 71  | 10 | 73  | 12 |
| 302.0 | 75.0  | Flutriafol 4      | 71  | 10 | 101 | 10 |
| 353.1 | 228.0 | Hexythiazox 1     | 36  | 10 | 23  | 14 |
| 353.1 | 168.1 | Hexythiazox 2     | 36  | 10 | 35  | 10 |
| 289.0 | 91.0  | Iprobenfos 1      | 51  | 10 | 39  | 14 |
| 289.0 | 205.0 | Iprobenfos 2      | 51  | 10 | 15  | 14 |
| 289.0 | 247.0 | Iprobenfos 3      | 51  | 10 | 11  | 16 |
| 289.0 | 65.1  | Iprobenfos 4      | 51  | 10 | 83  | 10 |
| 314.0 | 162.1 | Isazofos 1        | 186 | 10 | 25  | 10 |
| 314.0 | 97.0  | Isazofos 2        | 186 | 10 | 55  | 12 |
| 314.0 | 120.0 | Isazofos 3        | 70  | 10 | 40  | 9  |
| 314.0 | 119.1 | Isazofos 4        | 186 | 10 | 49  | 6  |



|       |       |                    |     |    |    |    |
|-------|-------|--------------------|-----|----|----|----|
| 211.0 | 152.1 | Isoproc carb 1     | 41  | 10 | 17 | 14 |
| 211.0 | 95.0  | Isoproc carb 2     | 25  | 10 | 24 | 7  |
| 331.1 | 127.1 | Malathion 1        | 90  | 10 | 19 | 8  |
| 331.1 | 285.0 | Malathion 2        | 90  | 10 | 11 | 20 |
| 331.1 | 99.0  | Malathion 3        | 90  | 10 | 33 | 12 |
| 331.1 | 125.0 | Malathion 4        | 90  | 10 | 41 | 12 |
| 278.0 | 210.0 | Metazachlor 1      | 50  | 10 | 15 | 13 |
| 278.0 | 134.0 | Metazachlor 2      | 50  | 10 | 30 | 13 |
| 278.0 | 105.1 | Metazachlor 3      | 31  | 10 | 53 | 12 |
| 278.0 | 77.1  | Metazachlor 4      | 31  | 10 | 81 | 14 |
| 280.1 | 220.1 | Metalaxyl 1        | 56  | 10 | 19 | 14 |
| 280.1 | 160.2 | Metalaxyl 2        | 56  | 10 | 33 | 10 |
| 280.2 | 192.3 | Metalaxyl 3        | 56  | 10 | 24 | 11 |
| 141.9 | 94.1  | Methamidophos 1    | 56  | 10 | 23 | 12 |
| 141.9 | 125.0 | Methamidophos 2    | 54  | 10 | 18 | 9  |
| 141.9 | 64.0  | Methamidophos 3    | 56  | 10 | 35 | 10 |
| 303.1 | 145.1 | Methiathion 1      | 121 | 10 | 15 | 10 |
| 303.1 | 85.1  | Methiathion 2      | 121 | 10 | 31 | 38 |
| 264.0 | 232.0 | Methyl Parathion 1 | 46  | 10 | 23 | 16 |
| 264.0 | 75.1  | Methyl Parathion 2 | 46  | 10 | 59 | 12 |
| 284.1 | 252.1 | Metolachlor 1      | 56  | 10 | 21 | 14 |
| 284.1 | 176.2 | Metolachlor 2      | 56  | 10 | 35 | 12 |
| 284.1 | 91.1  | Metolachlor 3      | 56  | 10 | 69 | 10 |
| 284.1 | 77.1  | Metolachlor 4      | 56  | 10 | 97 | 12 |
| 224.0 | 127.0 | Monocrotophos 1    | 126 | 10 | 23 | 16 |
| 224.0 | 98.1  | Monocrotophos 2    | 126 | 10 | 19 | 12 |
| 224.0 | 58.0  | Monocrotophos 3    | 126 | 10 | 41 | 16 |
| 224.0 | 109.1 | Monocrotophos 4    | 126 | 10 | 43 | 14 |
| 289.0 | 70.0  | Myclobutanil 1     | 136 | 10 | 23 | 8  |

|       |       |                          |     |    |    |    |
|-------|-------|--------------------------|-----|----|----|----|
| 289.0 | 125.0 | Myclobutanil 2           | 136 | 10 | 49 | 14 |
| 289.0 | 89.0  | Myclobutanil 3           | 136 | 10 | 83 | 10 |
| 214.0 | 125.1 | Omethoate 1              | 111 | 10 | 29 | 4  |
| 214.0 | 155.0 | Omethoate 2              | 111 | 10 | 21 | 10 |
| 214.0 | 109.0 | Omethoate 3              | 111 | 10 | 37 | 16 |
| 214.0 | 182.9 | Omethoate 4              | 56  | 10 | 16 | 6  |
| 279.1 | 219.1 | Oxadixyl 1               | 71  | 10 | 17 | 14 |
| 279.1 | 132.2 | Oxadixyl 2               | 71  | 10 | 45 | 8  |
| 279.1 | 101.9 | Oxadixyl 3               | 100 | 10 | 15 | 13 |
| 279.1 | 117.0 | Oxadixyl 4               | 71  | 10 | 69 | 14 |
| 292.2 | 96.9  | Parathion 1              | 61  | 10 | 53 | 38 |
| 292.2 | 264.0 | Parathion 2              | 60  | 10 | 15 | 13 |
| 282.1 | 212.0 | Pendimethalin 1          | 36  | 10 | 15 | 12 |
| 282.1 | 194.1 | Pendimethalin 2          | 36  | 10 | 25 | 16 |
| 408.0 | 153.1 | Permethrin 1             | 76  | 10 | 65 | 10 |
| 261.0 | 75.0  | Phorate 1                | 51  | 10 | 23 | 10 |
| 261.0 | 96.9  | Phorate 2                | 51  | 10 | 39 | 14 |
| 261.0 | 143.0 | Phorate 3                | 51  | 10 | 25 | 8  |
| 261.0 | 199.0 | Phorate 4                | 51  | 10 | 10 | 10 |
| 293.0 | 247.0 | Phorate sulfone 1        | 120 | 10 | 10 | 13 |
| 293.0 | 171.0 | Phorate sulfone 2        | 120 | 10 | 16 | 13 |
| 276.9 | 171.0 | Phorate-oxon sulfoxide 1 | 80  | 10 | 17 | 13 |
| 276.9 | 199.0 | Phorate-oxon sulfoxide 2 | 56  | 10 | 15 | 12 |
| 276.9 | 153.1 | Phorate-oxon sulfoxide 3 | 80  | 10 | 20 | 13 |
| 276.9 | 97.0  | Phorate-oxon sulfoxide 4 | 56  | 10 | 47 | 12 |
| 276.9 | 143.0 | Phorate-oxon sulfoxide 5 | 56  | 10 | 29 | 14 |
| 276.9 | 78.9  | Phorate-oxon sulfoxide 6 | 56  | 10 | 81 | 10 |
| 367.9 | 182.0 | Phosalone 1              | 56  | 10 | 25 | 12 |
| 367.9 | 111.1 | Phosalone 2              | 56  | 10 | 57 | 10 |

|       |       |                      |     |    |     |    |
|-------|-------|----------------------|-----|----|-----|----|
| 367.9 | 75.1  | Phosalone 3          | 56  | 10 | 97  | 12 |
| 367.9 | 74.1  | Phosalone 4          | 56  | 10 | 117 | 8  |
| 367.9 | 322.0 | Phosalone 5          | 120 | 10 | 13  | 13 |
| 318.1 | 256.3 | Phosmet 1            | 60  | 10 | 31  | 16 |
| 318.1 | 160.0 | Phosmet 2            | 60  | 10 | 19  | 30 |
| 318.1 | 77.0  | Phosmet 3            | 60  | 10 | 75  | 8  |
| 300.0 | 174.1 | Phosphamidon 1       | 156 | 10 | 19  | 8  |
| 300.0 | 127.0 | Phosphamidon 2       | 156 | 10 | 31  | 16 |
| 300.0 | 72.1  | Phosphamidon 3       | 156 | 10 | 47  | 8  |
| 300.0 | 108.9 | Phosphamidon 4       | 156 | 10 | 63  | 12 |
| 356.2 | 177.1 | Piperonyl butoxide 1 | 81  | 10 | 19  | 18 |
| 356.2 | 119.1 | Piperonyl butoxide 2 | 81  | 10 | 49  | 14 |
| 356.2 | 147.0 | Piperonyl butoxide 3 | 100 | 10 | 45  | 13 |
| 356.2 | 91.0  | Piperonyl butoxide 4 | 81  | 10 | 75  | 26 |
| 356.2 | 149.0 | Piperonyl butoxide 5 | 81  | 10 | 47  | 18 |
| 306.0 | 164.1 | Pirimiphos methyl 1  | 156 | 10 | 29  | 10 |
| 306.0 | 108.0 | Pirimiphos methyl 2  | 156 | 10 | 41  | 12 |
| 306.0 | 67.0  | Pirimiphos methyl 3  | 156 | 10 | 59  | 8  |
| 306.0 | 125.0 | Pirimiphos methyl 4  | 156 | 10 | 43  | 10 |
| 334.0 | 198.1 | Primiphos ethyl 1    | 6   | 10 | 31  | 12 |
| 334.0 | 182.1 | Primiphos ethyl 2    | 6   | 10 | 31  | 12 |
| 334.0 | 170.1 | Primiphos ethyl 3    | 6   | 10 | 43  | 10 |
| 334.0 | 96.9  | Primiphos ethyl 4    | 6   | 10 | 65  | 12 |
| 372.9 | 302.7 | Profenofos 1         | 156 | 10 | 27  | 22 |
| 372.9 | 344.9 | Profenofos 2         | 156 | 10 | 19  | 22 |
| 372.9 | 128.0 | Profenofos 3         | 156 | 10 | 55  | 16 |
| 372.9 | 97.0  | Profenofos 4         | 156 | 10 | 41  | 16 |
| 242.1 | 158.1 | Prometryne 1         | 221 | 10 | 33  | 10 |
| 242.1 | 200.1 | Prometryne 2         | 221 | 10 | 27  | 12 |

|       |       |                   |     |    |    |    |
|-------|-------|-------------------|-----|----|----|----|
| 242.1 | 85.0  | Prometryne 3      | 221 | 10 | 43 | 10 |
| 242.1 | 68.1  | Prometryne 4      | 221 | 10 | 99 | 4  |
| 242   | 116.1 | Prometryne 5      | 166 | 10 | 39 | 14 |
| 368.1 | 231.2 | Propargite 1      | 36  | 10 | 15 | 16 |
| 368.1 | 175.2 | Propargite 2      | 36  | 10 | 23 | 4  |
| 230.0 | 188.0 | Propazine 1       | 80  | 10 | 25 | 12 |
| 230.0 | 146.1 | Propazine 2       | 80  | 10 | 33 | 10 |
| 230.0 | 104.0 | Propazine 3       | 80  | 10 | 43 | 12 |
| 230   | 78.9  | Propazine 4       | 80  | 10 | 45 | 12 |
| 344.8 | 240.7 | Prothiofos 1      | 80  | 10 | 25 | 16 |
| 344.8 | 268.9 | Prothiofos 2      | 80  | 10 | 17 | 20 |
| 344.8 | 132.9 | Prothiofos 3      | 80  | 10 | 71 | 16 |
| 344.8 | 160.9 | Prothiofos 4      | 80  | 10 | 47 | 12 |
| 344.8 | 176.9 | Prothiofos 5      | 80  | 10 | 41 | 10 |
| 344.8 | 161.9 | Prothiofos 6      | 80  | 10 | 55 | 12 |
| 365.0 | 308.9 | Pyridaben 1       | 80  | 10 | 19 | 20 |
| 365.0 | 147.1 | Pyridaben 2       | 80  | 10 | 35 | 10 |
| 365.0 | 117.0 | Pyridaben 3       | 80  | 10 | 87 | 14 |
| 365.0 | 98.0  | Pyridaben 4       | 80  | 10 | 61 | 12 |
| 341.0 | 189.1 | Pyridaphenthion 1 | 80  | 10 | 31 | 12 |
| 341.0 | 92.1  | Pyridaphenthion 2 | 80  | 10 | 53 | 10 |
| 341.0 | 65.0  | Pyridaphenthion 3 | 80  | 10 | 75 | 8  |
| 341.0 | 97.0  | Pyridaphenthion 4 | 80  | 10 | 73 | 14 |
| 200.0 | 107.0 | Pyrimethanil 1    | 211 | 10 | 33 | 16 |
| 200.0 | 77.0  | Pyrimethanil 2    | 211 | 10 | 55 | 10 |
| 200.0 | 67.1  | Pyrimethanil 3    | 211 | 10 | 57 | 8  |
| 200.0 | 51.0  | Pyrimethanil 4    | 211 | 10 | 91 | 24 |
| 174.0 | 132.1 | Pyroquilon 1      | 166 | 10 | 33 | 10 |
| 174.0 | 117.1 | Pyroquilon 2      | 166 | 10 | 45 | 12 |

|       |       |                   |     |    |    |    |
|-------|-------|-------------------|-----|----|----|----|
| 174.0 | 89.0  | Pyroquilon 3      | 166 | 10 | 75 | 12 |
| 174.0 | 77.0  | Pyroquilon 4      | 166 | 10 | 67 | 10 |
| 299.0 | 97.0  | Quinalphos 1      | 80  | 10 | 49 | 12 |
| 299.0 | 163.1 | Quinalphos 2      | 80  | 10 | 31 | 10 |
| 299.0 | 147.1 | Quinalphos 3      | 80  | 10 | 31 | 10 |
| 299.0 | 119.1 | Quinalphos 4      | 80  | 10 | 59 | 14 |
| 503.0 | 208.1 | Tau Fluvalinate 1 | 80  | 10 | 19 | 14 |
| 503.0 | 181.1 | Tau Fluvalinate 2 | 80  | 10 | 45 | 20 |
| 503.0 | 152.0 | Tau Fluvalinate 3 | 80  | 10 | 99 | 8  |
| 503.0 | 295.1 | Tau Fluvalinate 4 | 80  | 10 | 17 | 13 |
| 258.1 | 125.0 | Thiobencarb 1     | 80  | 10 | 25 | 8  |
| 258.2 | 57.0  | Thiobencarb 2     | 80  | 10 | 47 | 8  |
| 296.1 | 70.0  | Triadimenol 1     | 80  | 10 | 39 | 10 |
| 296.1 | 149.0 | Triadimenol 2     | 80  | 10 | 27 | 10 |
| 314   | 162.1 | Triazophos-1      | 80  | 10 | 25 | 10 |
| 314   | 119.6 | Triazophos-2      | 80  | 10 | 49 | 10 |
| 314   | 120   | Triazophos-3      | 80  | 10 | 35 | 10 |
| 314   | 97    | Triazophos-4      | 80  | 10 | 57 | 10 |
| 318.2 | 70.0  | Triticonazole 1   | 80  | 10 | 55 | 10 |
| 318.2 | 125.1 | Triticonazole 2   | 80  | 10 | 31 | 13 |
| 288.0 | 146.2 | Vamidothion 1     | 80  | 10 | 17 | 10 |
| 288.0 | 118.0 | Vamidothion 2     | 80  | 10 | 35 | 14 |
| 288.0 | 58.0  | Vamidothion 3     | 80  | 10 | 53 | 8  |
| 288.0 | 86.1  | Vamidothion 4     | 80  | 10 | 33 | 10 |

**Table S4.** Matrix species with pesticides with all their MRM transitions showing MEs > 100% under MRM scan mode.

| Pesticides      | Matrix                                                                                                                                                                                               |
|-----------------|------------------------------------------------------------------------------------------------------------------------------------------------------------------------------------------------------|
| Carbendazim     | Basil, Cowpea, Green chili, Maize                                                                                                                                                                    |
| Difenoconazole  | Basil, Cowpea                                                                                                                                                                                        |
| Methiathion     | Amaranth, Basil, Blueberry, Cabbage, Chinese yam, Green tea, Green chili, Lemon, Mint, Pea seedling, Red chili, Soybean                                                                              |
| Myclobutanil    | Lemon                                                                                                                                                                                                |
| Propargite      | Amaranth, <i>Aritemisia selengensis</i> , Asparagus, Basil, Blueberry, Cabbage, Cowpea, Garlic sprout, Green tea, Mint, Okra, Oyster mushroom, Red chili, Shiitake mushroom, Soybean, Green pimiento |
| Tau-fluvalinate | Soybean                                                                                                                                                                                              |

**Table S5.** List of 20 pesticides with all their 69 MRM transitions as differential pesticide MRM transitions between groups G1 and G2.

| Chemical classes         | Pesticides                                                                                                             |
|--------------------------|------------------------------------------------------------------------------------------------------------------------|
| Amidoxine                | Cyflufenamid                                                                                                           |
| Aryloxyphenoxypropionate | Fluazifop-butyl                                                                                                        |
| Carboxamide              | Hexythiazox                                                                                                            |
| Chloroacetamide          | Dimethenamid, Alachlor,                                                                                                |
| Organophosphate          | Chlorpyrifos, Coumaphos, Diazinon, Dimethoate, Ethion, Isazofos, Parathion, Pirimiphos-methyls, Prothiofos, Quinalphos |
| Sulfonylurea             | Chlorsulfuron                                                                                                          |
| Triazine                 | Propazine                                                                                                              |
| Triazole                 | Triadimenol, Triconazole                                                                                               |

**Table S6.** 13 positive pesticides in corresponding matrices in MS/MS scan under IDA mode by UPLC QTOF

| Pesticide Name | Matrices                         | MRLs<br>(mg/kg) | Addition level<br>(mg/kg) | S/N     | Found at mass<br>(Da) | Error<br>(ppm) | Found at<br><i>t<sub>R</sub></i> (min) | Library hit  | Library<br>score |
|----------------|----------------------------------|-----------------|---------------------------|---------|-----------------------|----------------|----------------------------------------|--------------|------------------|
| Chlorpyrifos   | Asparagus                        | 0.05            | 0.05                      | 581.8   | 321.9027              | 1.3            | 11.15                                  | Chlorpyrifos | 97.7             |
| Chlorpyrifos   | Orange                           | 2               | 0.05                      | 682.1   | 321.9028              | 1.6            | 11.07                                  | Chlorpyrifos | 97.7             |
| Chlorpyrifos   | Lemon                            | 2               | 0.05                      | 707.6   | 321.9027              | 1.4            | 11.13                                  | Chlorpyrifos | 98.2             |
| Chlorpyrifos   | Green tea                        | 2               | 0.625                     | 1196    | 321.903               | 2.4            | 11.12                                  | Chlorpyrifos | 94.7             |
| Chlorpyrifos   | Mint                             | 2               | 0.625                     | 686.8   | 321.9031              | 2.7            | 11.13                                  | Chlorpyrifos | 97.4             |
| Chlorpyrifos   | <i>Amomum tsao-ko</i>            | 2               | 0.625                     | 355.8   | 321.9029              | 1.9            | 11.12                                  | /            | /                |
| Chlorpyrifos   | Sichuan pepper                   | 2               | 0.625                     | 233.3   | 321.902               | 0.9            | 11.11                                  | /            | /                |
| Coumaphos      | Orange                           | 0.05            | 0.05                      | 2986.5  | 363.0022              | 1.3            | 10.12                                  | Coumaphos    | 100              |
| Coumaphos      | Blueberry                        | 0.05            | 0.05                      | 2028.3  | 363.0222              | 1.4            | 10.11                                  | Coumaphos    | 99.8             |
| Coumaphos      | Lemon                            | 0.05            | 0.05                      | 1131.3  | 363.0222              | 1.2            | 10.09                                  | Coumaphos    | 99.7             |
| Coumaphos      | Cabbage                          | 0.05            | 0.05                      | 814.5   | 363.0225              | 2.2            | 10.11                                  | Coumaphos    | 99.6             |
| Coumaphos      | Wheat grass                      | 0.05            | 0.05                      | 1563    | 363.0223              | 1.5            | 10.13                                  | Coumaphos    | 100              |
| Coumaphos      | Red chili                        | 0.05            | 0.05                      | 1701.4  | 363.0227              | 2.7            | 10.15                                  | Coumaphos    | 99.5             |
| Coumaphos      | Amaranth                         | 0.05            | 0.05                      | 2390.6  | 363.0223              | 1.5            | 10.17                                  | Coumaphos    | 99.2             |
| Coumaphos      | Cowpea                           | 0.05            | 0.05                      | 1178.4  | 363.0226              | 2.3            | 10.11                                  | Coumaphos    | 100              |
| Coumaphos      | Winged bean                      | 0.05            | 0.05                      | 40716.4 | 363.0221              | 1.1            | 10.11                                  | Coumaphos    | 99.3             |
| Coumaphos      | <i>Artemisia<br/>selengensis</i> | 0.05            | 0.05                      | 2123.9  | 363.0223              | 1.5            | 10.15                                  | Coumaphos    | 99.6             |
| Coumaphos      | Asparagus                        | 0.05            | 0.05                      | 3544.4  | 363.0221              | 1              | 10.18                                  | Coumaphos    | 99.5             |
| Coumaphos      | Green chili                      | 0.05            | 0.05                      | 40260.7 | 363.0222              | 1.3            | 10.1                                   | Coumaphos    | 99.7             |
| Coumaphos      | Okra                             | 0.05            | 0.05                      | 53195.1 | 363.0226              | 2.5            | 10.11                                  | Coumaphos    | 99.6             |
| Coumaphos      | Chinese yam                      | 0.05            | 0.05                      | 41005.6 | 363.0223              | 1.5            | 10.12                                  | Coumaphos    | 99.6             |

|            |                                  |      |      |         |          |     |       |            |      |
|------------|----------------------------------|------|------|---------|----------|-----|-------|------------|------|
| Coumaphos  | Ginger                           | 0.05 | 0.05 | 20611.8 | 363.0231 | 3.8 | 10.11 | Coumaphos  | 98.8 |
| Coumaphos  | Garlic sprout                    | 0.05 | 0.05 | 601     | 363.0219 | 0.5 | 10.11 | Coumaphos  | 100  |
| Coumaphos  | Pea seedling                     | 0.05 | 0.05 | 996     | 363.0224 | 1.7 | 10.11 | Coumaphos  | 100  |
| Coumaphos  | Zucchini                         | 0.05 | 0.05 | 834.4   | 363.0222 | 1.2 | 10.11 | Coumaphos  | 100  |
| Coumaphos  | Green pimiento                   | 0.05 | 0.05 | 429979  | 363.0223 | 1.4 | 10.11 | Coumaphos  | 100  |
| Dichlorvos | Orange                           | 0.2  | 0.05 | 773.7   | 220.9534 | 0.9 | 6.88  | Dichlorvos | 96.7 |
| Dichlorvos | Blueberry                        | 0.2  | 0.05 | 1733.5  | 220.9535 | 1.3 | 6.87  | Dichlorvos | 93.9 |
| Dichlorvos | Lemon                            | 0.2  | 0.05 | 1770.5  | 220.9533 | 0.6 | 6.89  | Dichlorvos | 98.7 |
| Dichlorvos | Cabbage                          | 0.5  | 0.05 | 2019.8  | 220.9538 | 2.3 | 6.88  | Dichlorvos | 98.5 |
| Dichlorvos | Wheatgrass                       | 0.2  | 0.05 | 1596.4  | 220.9533 | 0.6 | 6.85  | Dichlorvos | 99.1 |
| Dichlorvos | Red chili                        | 0.2  | 0.05 | 1544.7  | 220.953  | 1.5 | 6.85  | Dichlorvos | 97.6 |
| Dichlorvos | Amaranth                         | 0.2  | 0.05 | 1966.6  | 220.9536 | 1.8 | 6.89  | Dichlorvos | 98.3 |
| Dichlorvos | Cowpea                           | 0.2  | 0.05 | 1775.7  | 220.9535 | 1.5 | 6.82  | Dichlorvos | 99.2 |
| Dichlorvos | Winged bean                      | 0.2  | 0.05 | 2006.7  | 220.9534 | 0.9 | 6.83  | Dichlorvos | 96.5 |
| Dichlorvos | <i>Artemisia<br/>selengensis</i> | 0.2  | 0.05 | 1706.1  | 220.9536 | 1.8 | 6.84  | /          | /    |
| Dichlorvos | Asparagus                        | 0.2  | 0.05 | 2065.1  | 220.9534 | 1   | 6.84  | Dichlorvos | 98.3 |
| Dichlorvos | Green chili                      | 0.2  | 0.05 | 1895.2  | 220.9533 | 0.5 | 6.84  | Dichlorvos | 99.2 |
| Dichlorvos | Okra                             | 0.2  | 0.05 | 2079.1  | 220.9535 | 1.6 | 6.85  | Dichlorvos | 99.1 |
| Dichlorvos | Chinese yam                      | 0.2  | 0.05 | 1940.9  | 220.9532 | 0.1 | 6.89  | Dichlorvos | 100  |
| Dichlorvos | Ginger                           | 0.2  | 0.05 | 1183.8  | 220.9536 | 1.9 | 6.85  | Dichlorvos | 88.7 |
| Dichlorvos | Garlic sprout                    | 0.2  | 0.05 | 671.8   | 220.9535 | 1.4 | 6.82  | Dichlorvos | 98.9 |
| Dichlorvos | Pea seedling                     | 0.2  | 0.05 | 1510.6  | 220.953  | 1.4 | 6.82  | Dichlorvos | 98.5 |
| Dichlorvos | Zucchini                         | 0.2  | 0.05 | 786.2   | 220.9533 | 0.6 | 6.82  | Dichlorvos | 95.5 |
| Dichlorvos | Green pimiento                   | 0.2  | 0.05 | 1821.8  | 220.9535 | 1.5 | 6.81  | Dichlorvos | 98.1 |



|               |                                  |      |       |        |          |      |       |               |      |
|---------------|----------------------------------|------|-------|--------|----------|------|-------|---------------|------|
| Epoxiconazole | Orange                           | 1    | 0.05  | 4069.3 | 330.0802 | -0.5 | 8.82  | Epoxiconazole | 97.7 |
| Fenarimol     | Green pimiento                   | 0.5  | 0.05  | 2166.6 | 331.0407 | 2.4  | 8.65  | Fenarimol     | 99.9 |
| Fenthion      | Orange                           | 0.05 | 0.05  | 2713.7 | 279.0279 | 0.9  | 9.85  | Fenthion      | 97.7 |
| Fenthion      | Blueberry                        | 0.05 | 0.05  | 3671.8 | 279.0275 | 0.7  | 9.86  | Fenthion      | 99.7 |
| Fenthion      | Lemon                            | 0.05 | 0.05  | 1986.1 | 279.0275 | 0.9  | 9.85  | Fenthion      | 97.8 |
| Fenthion      | Cabbage                          | 2    | 0.05  | 2213.6 | 279.0277 | 1.4  | 9.85  | Fenthion      | 99.1 |
| Fenthion      | Wheat grass                      | 0.05 | 0.05  | 6671.8 | 279.027  | 1.2  | 9.88  | Fenthion      | 99.7 |
| Fenthion      | Red chili                        | 0.05 | 0.05  | 3108   | 279.0278 | 1.8  | 9.85  | Fenthion      | 99.5 |
| Fenthion      | Amaranth                         | 0.05 | 0.05  | 3069.3 | 279.028  | 2.5  | 9.85  | Fenthion      | 97.8 |
| Fenthion      | Cowpea                           | 0.05 | 0.05  | 2250.2 | 279.0278 | 1.9  | 9.85  | Fenthion      | 100  |
| Fenthion      | Winged bean                      | 0.05 | 0.05  | 1819.2 | 279.0277 | 1.4  | 9.85  | Fenthion      | 99.3 |
| Fenthion      | <i>Artemisia<br/>selengensis</i> | 0.05 | 0.05  | 1166.9 | 279.0277 | 1.6  | 9.82  | Fenthion      | 98.6 |
| Fenthion      | Asparagus                        | 0.05 | 0.05  | 3722.9 | 279.0276 | 1.1  | 9.82  | Fenthion      | 96.1 |
| Fenthion      | Green chili                      | 0.05 | 0.05  | 4100.6 | 279.0277 | 1.4  | 9.87  | Fenthion      | 98.3 |
| Fenthion      | Okra                             | 0.05 | 0.05  | 7805.3 | 279.0279 | 2.2  | 9.87  | Fenthion      | 98.7 |
| Fenthion      | Chinese yam                      | 0.05 | 0.05  | 2622.5 | 279.027  | 1.1  | 9.88  | Fenthion      | 97.9 |
| Fenthion      | Ginger                           | 0.05 | 0.05  | 4560   | 279.0279 | 2.2  | 9.82  | Fenthion      | 93.4 |
| Fenthion      | Garlic sprout                    | 0.05 | 0.05  | 1270.5 | 279.0276 | 1.2  | 9.82  | Fenthion      | 99.2 |
| Fenthion      | Pea seedling                     | 0.05 | 0.05  | 2250.2 | 279.0278 | 1.9  | 9.82  | Fenthion      | 100  |
| Fenthion      | Zucchini                         | 0.05 | 0.05  | 2151.9 | 279.0275 | 0.9  | 9.83  | Fenthion      | 99.2 |
| Fenthion      | Green pimiento                   | 0.05 | 0.05  | 3340.7 | 279.0276 | 1    | 9.82  | Fenthion      | 99.5 |
| Hexythiazox   | Orange                           | 0.5  | 0.05  | 744.7  | 353.1089 | 1.2  | 11.25 | Hexythiazox   | 25.8 |
| Hexythiazox   | Lemon                            | 0.5  | 0.05  | 1922.7 | 353.1088 | 0.8  | 11.26 | Hexythiazox   | 24.9 |
| Hexythiazox   | Green tea                        | 15   | 0.625 | 2403.4 | 353.109  | 1.5  | 11.25 | Hexythiazox   | 12.2 |

|               |                                  |      |       |        |          |      |       |               |      |
|---------------|----------------------------------|------|-------|--------|----------|------|-------|---------------|------|
| Methidathion  | Orange                           | 0.05 | 0.05  | 2806.7 | 302.9709 | 5.8  | 8.53  | /             | /    |
| Methidathion  | Blueberry                        | 0.05 | 0.05  | 4649.8 | 302.9696 | 1.7  | 8.5   | Methidathion  | 99   |
| Methidathion  | Lemon                            | 0.05 | 0.05  | 3563.7 | 302.9689 | -0.7 | 8.5   | /             | /    |
| Methidathion  | Cabbage                          | 0.05 | 0.05  | 4112.9 | 302.9702 | 3.5  | 8.54  | /             | /    |
| Methidathion  | Wheat grass                      | 0.05 | 0.05  | 5094.3 | 302.969  | 2.8  | 8.5   | /             | /    |
| Methidathion  | Red chili                        | 0.05 | 0.05  | 4219.6 | 302.97   | 2.8  | 8.59  | Methidathion  | 100  |
| Methidathion  | Amaranth                         | 0.05 | 0.05  | 3392   | 302.9702 | 3.5  | 8.59  | Methidathion  | 98.3 |
| Methidathion  | Cowpea                           | 0.05 | 0.05  | 3398.8 | 302.9698 | 2.3  | 8.59  | /             | /    |
| Methidathion  | Winged bean                      | 0.05 | 0.05  | 4415.7 | 302.9692 | 0.3  | 8.59  | /             | /    |
| Methidathion  | <i>Artemisia<br/>selengensis</i> | 0.05 | 0.05  | 1722.6 | 302.9713 | 7.3  | 8.58  | /             | /    |
| Methidathion  | Asparagus                        | 0.05 | 0.05  | 3820.3 | 302.9698 | 2.2  | 8.54  | /             | /    |
| Methidathion  | Green chili                      | 0.05 | 0.05  | 4073   | 302.9698 | 2.4  | 8.55  | Methidathion  | 100  |
| Methidathion  | Okra                             | 0.05 | 0.05  | 3543.8 | 302.9701 | 3.3  | 8.55  | /             | /    |
| Methidathion  | Chinese yam                      | 0.05 | 0.05  | 4065.7 | 302.9697 | 1.9  | 8.55  | Methidathion  | 100  |
| Methidathion  | Ginger                           | 0.05 | 0.05  | 1378.4 | 302.9705 | 4.6  | 8.53  | /             | /    |
| Methidathion  | Garlic sprout                    | 0.05 | 0.05  | 82.8   | 302.9697 | 1.9  | 8.53  | /             | /    |
| Methidathion  | Pea seedling                     | 0.05 | 0.05  | 3253.5 | 32.9699  | 2.5  | 8.52  | /             | /    |
| Methidathion  | Zucchini                         | 0.05 | 0.05  | 122.1  | 302.9696 | 1.6  | 8.58  | /             | /    |
| Methidathion  | Green pimiento                   | 0.05 | 0.05  | 3464   | 302.9697 | 1.9  | 8.58  | Methidathion  | 96.9 |
| Pendimethalin | Cabbage                          | 0.5  | 0.05  | 814.5  | 363.0225 | 2.2  | 11.19 | Pendimethalin | 99.6 |
| Pendimethalin | Asparagus                        | 0.1  | 0.05  | 3544.4 | 363.0221 | 1    | 11.2  | Pendimethalin | 99.5 |
| Phosalone     | <i>Amomum tsao-ko</i>            | 2    | 0.625 | 204931 | 367.9951 | 2.6  | 10.25 | /             | /    |
| Phosalone     | Sichuan pepper                   | 2    | 0.625 | 9811.5 | 367.9949 | 2.1  | 10.28 | /             | /    |
| Phosmet       | Orange                           | 5    | 0.05  | 377.2  | 318.002  | 0.6  | 8.71  | Phosmet       | 98.6 |

|                 |             |      |      |         |          |     |       |            |      |
|-----------------|-------------|------|------|---------|----------|-----|-------|------------|------|
| Phosmet         | Lemon       | 5    | 0.05 | 443.4   | 318.0026 | 2.4 | 8.75  | Phosmet    | 98.4 |
| Phosmet         | Blueberry   | 10   | 0.05 | 401.3   | 318.0025 | 2   | 8.75  | Phosmet    | 97.3 |
| Phosmet         | Cabbage     | 0.5  | 0.05 | 135.7   | 318.0028 | 3   | 8.7   | Phosmet    | 85.7 |
| Profenofos      | Cabbage     | 0.05 | 0.05 | 56759.2 | 372.9434 | 2.7 | 10.57 | Profenofos | 99.2 |
| Profenofos      | Red chili   | 3    | 0.05 | 90977.7 | 372.9431 | 1.9 | 10.57 | Profenofos | 99.2 |
| Profenofos      | Green chili | 3    | 0.05 | 84789.2 | 372.9429 | 1.3 | 10.57 | Profenofos | 100  |
| Profenofos      | Orange      | 0.2  | 0.05 | 94685.3 | 372.943  | 1.7 | 10.6  | Profenofos | 99.5 |
| Tau-fluvalinate | Cabbage     | 0.5  | 0.05 | 533.6   | 503.1036 | 2.3 | 11.99 | /          | /    |

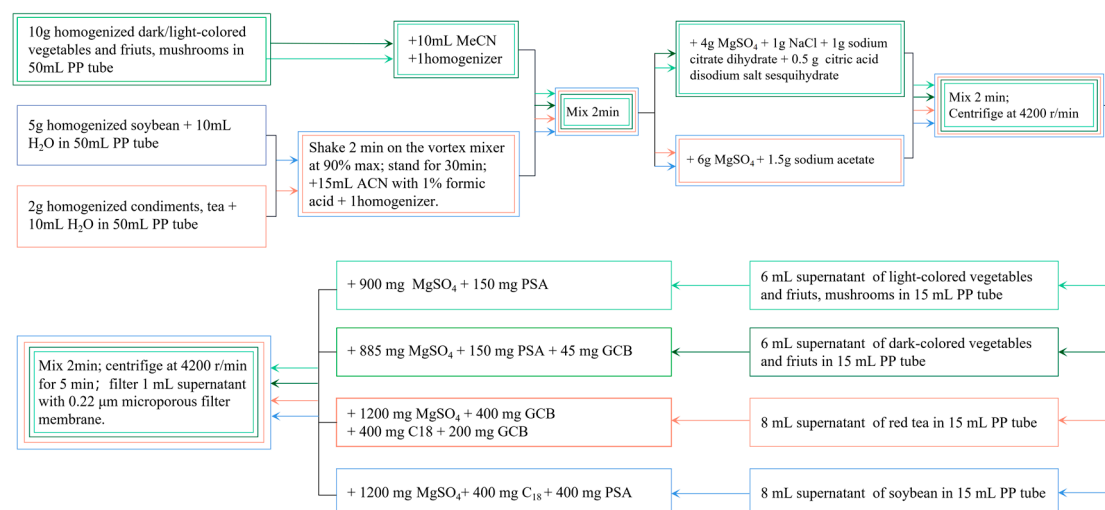

**Figure S1.** Sample preparation procedures according to the GB 23200.121-2021 National Food

Safety Standard. The flow chart of the QuEChERS cleanup procedure for light fruits and vegetables

and mushrooms were colored in light green, for dark fruits and vegetables was colored in dark green,

for condiments and tea were colored in orange, and for soybeans were colored in blue.

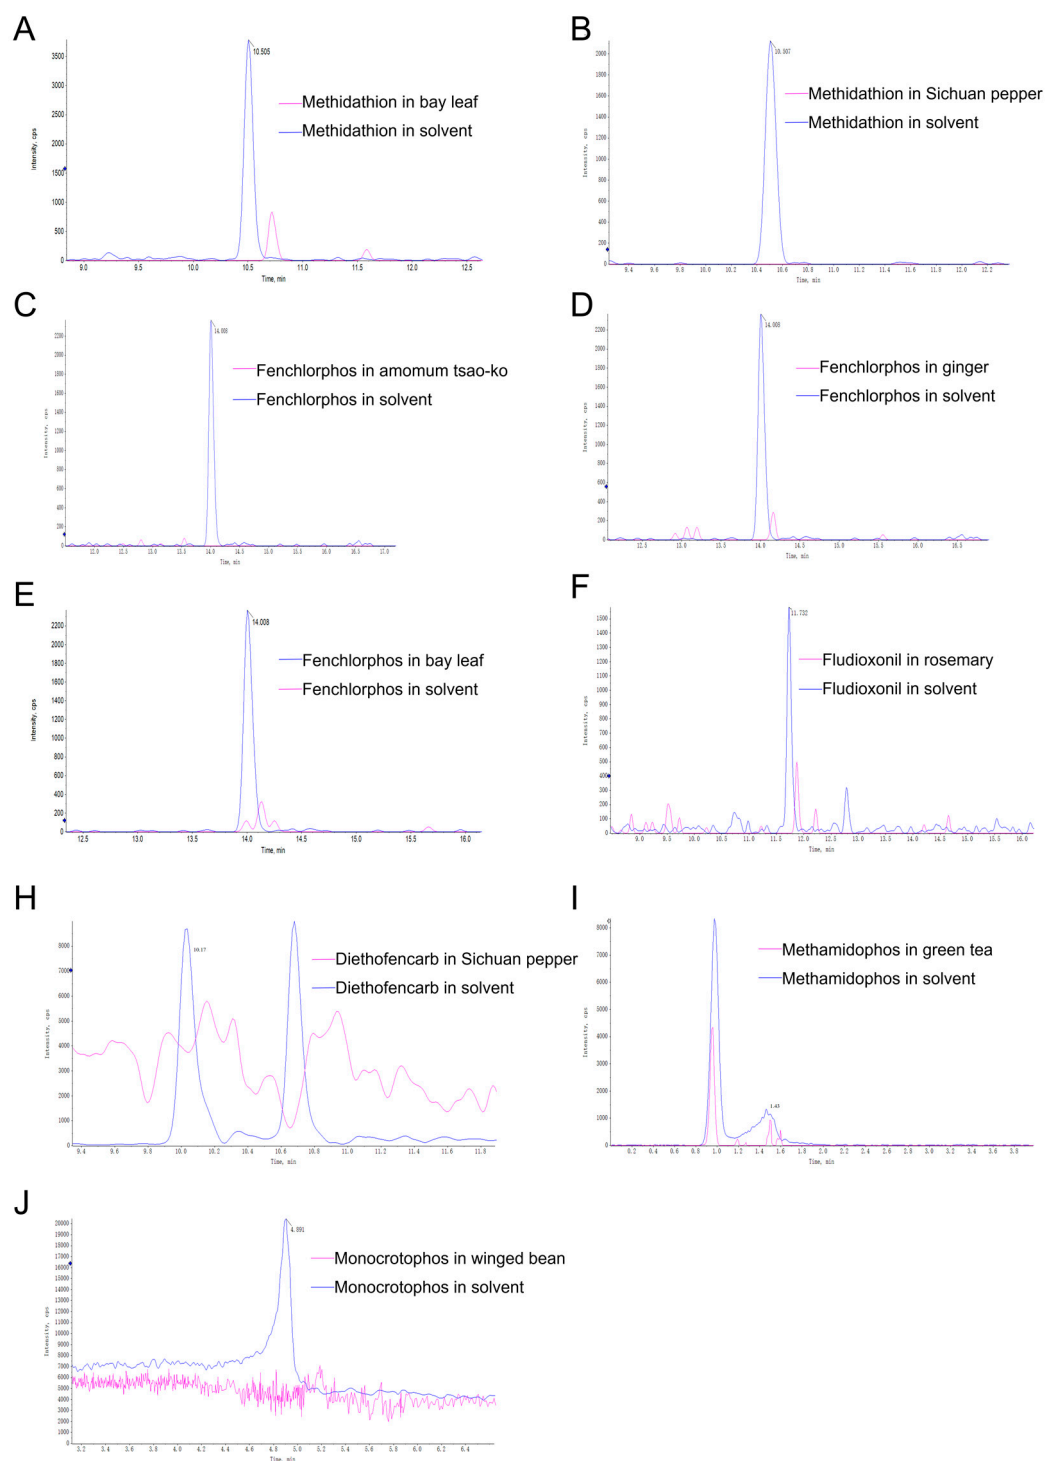

**Figure S2.** Extracted ion chromatogram (XIC) of pesticides with 100% signal suppression (MEs = -100%) in matrix-matched and reagent-only standard solutions.

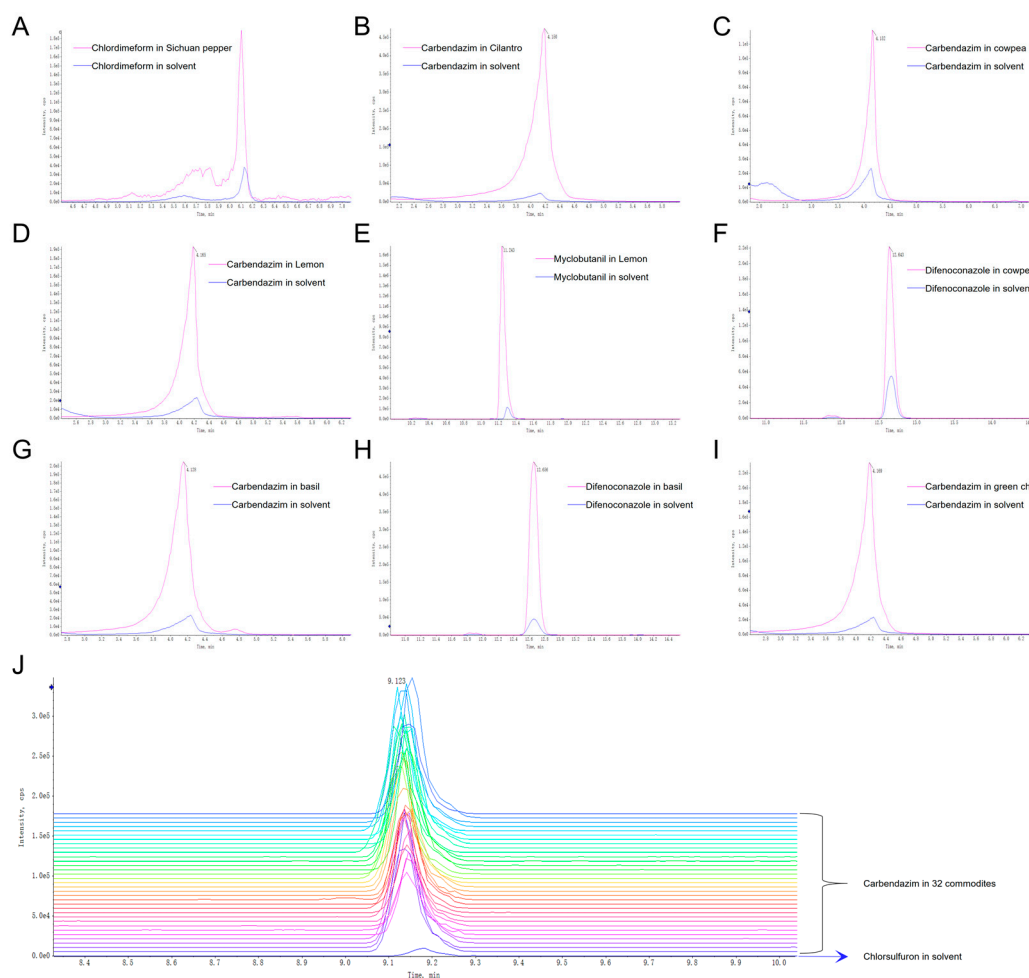

**Figure S3.** Extracted ion chromatogram (XIC) of pesticides with extreme signal enhancement (MEs > 100%) in matrix-matched and reagent-only standard solutions.

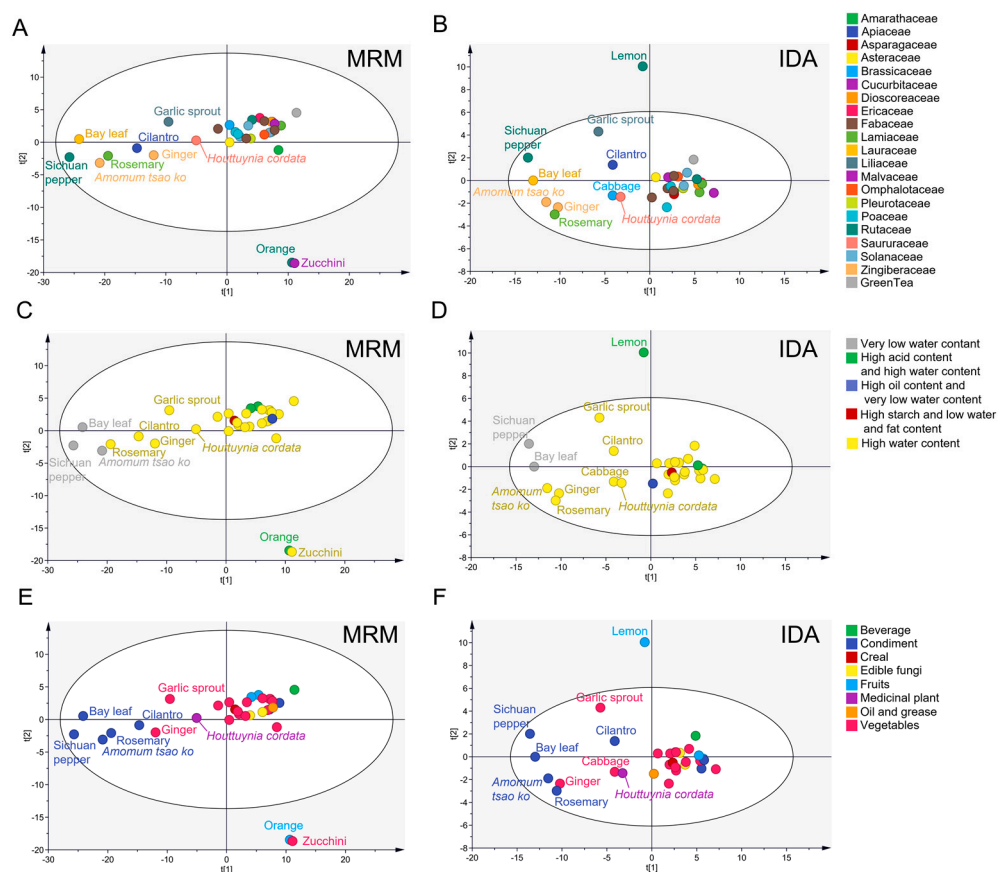

**Figure S4.** The score plots of PCA modeling under MRM and in TOF-MS scan under IDA mode, colored by botanical classifications (A) and (B), the Document N° SANTE/11312/2021 (C) and (D), and the GB 2763-2021 National Food Safety Standard (E) and (F), respectively.

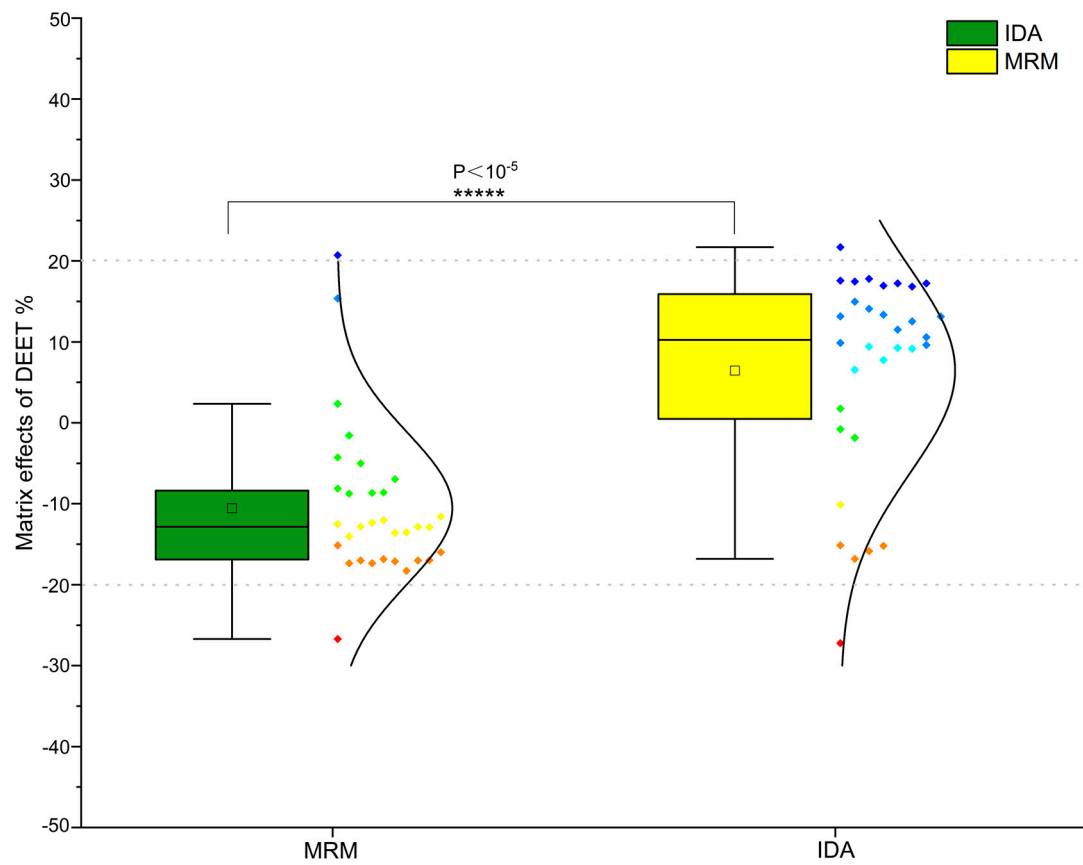

**Figure S5.** Distribution of DEET's MEs under IDA scan and MRM scan.
